# Supplementary material for: Spatio-temporal variation of radionuclide dispersion from nuclear power plant accidents using FLEXPART ensemble modeling
Source: Copernicus journal article supplement (doi:10.5194/acp-2022-383), 2022-06-29
Supplement: Supplementary file 1 [file acp-2022-383-supplement.pdf]

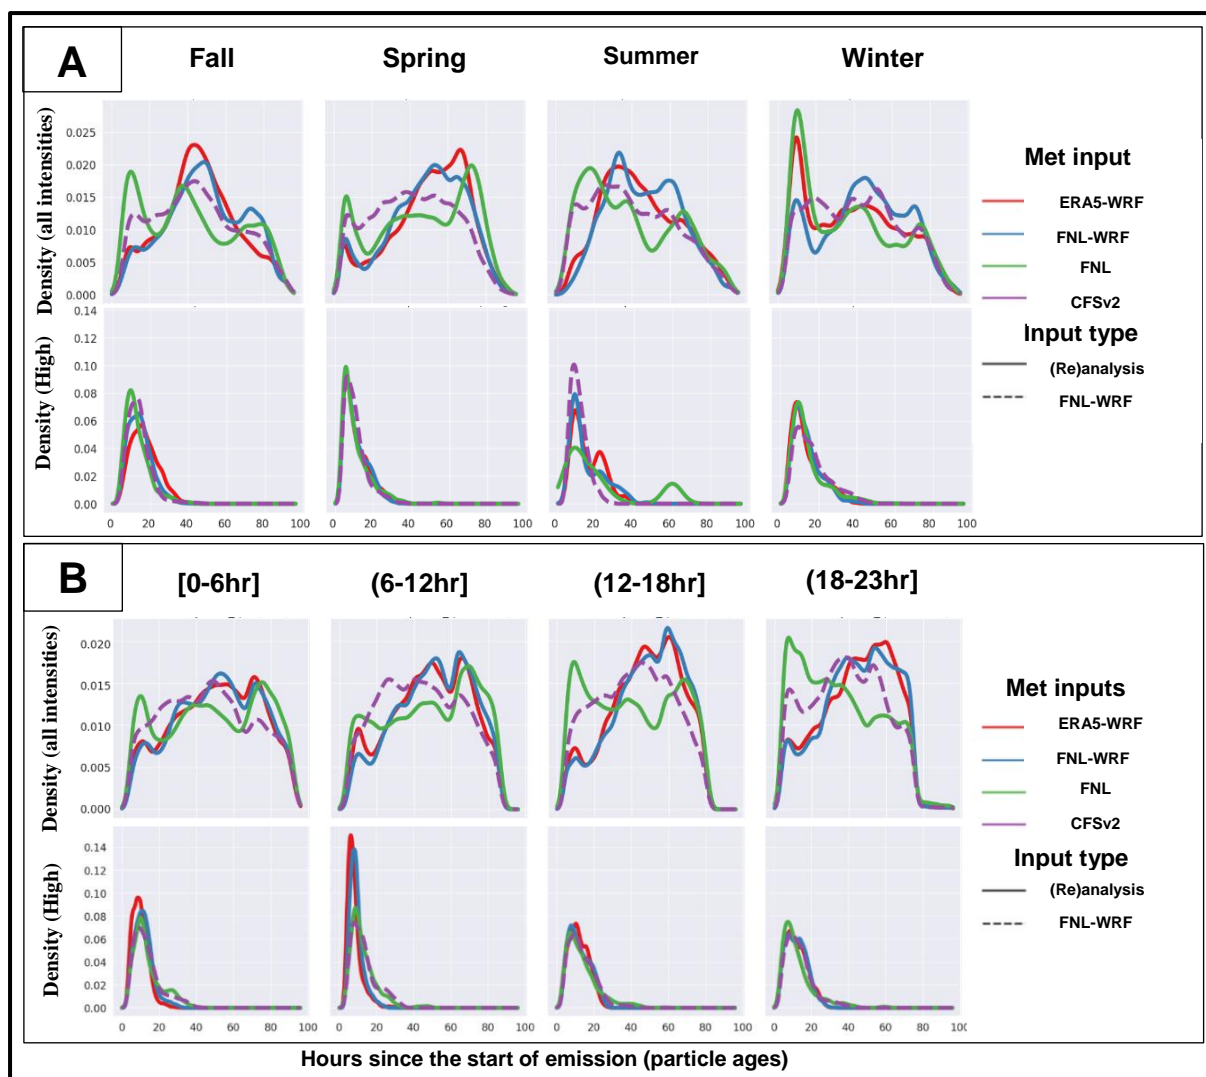

Figure S1 Same as Figure 2 but for  $^{137}\text{Cs}$ .

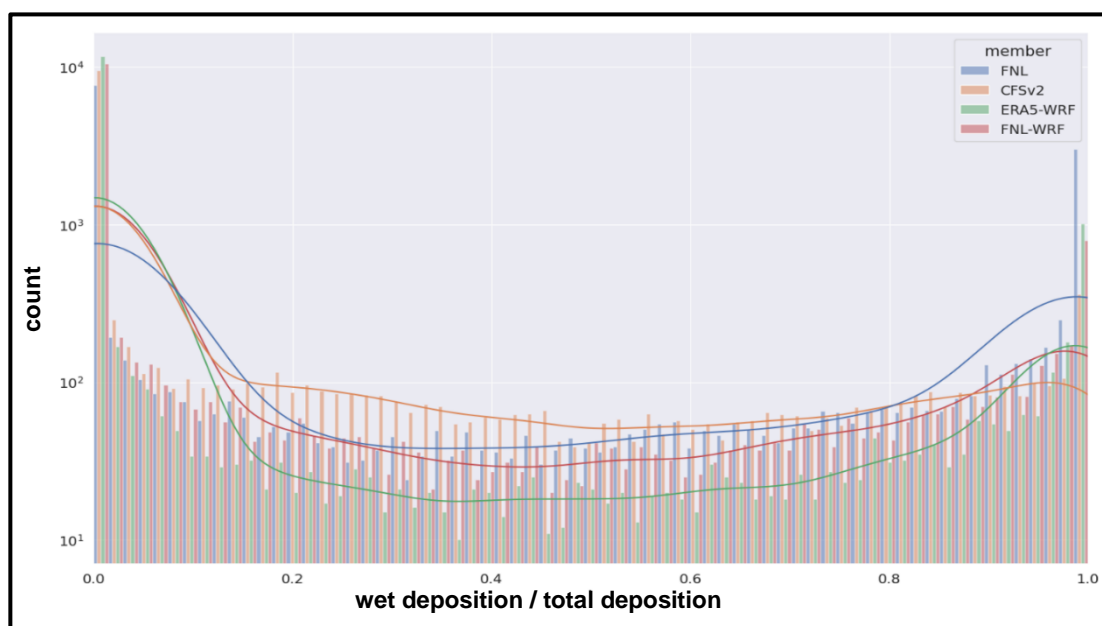

Figure S2 The distribution of the ratio of  $^{137}\text{Cs}$  wet deposition to total  $^{137}\text{Cs}$  deposition. Colors represent members and lines are the corresponding kernel density estimates of counts. Counts are on a logarithmic scale.

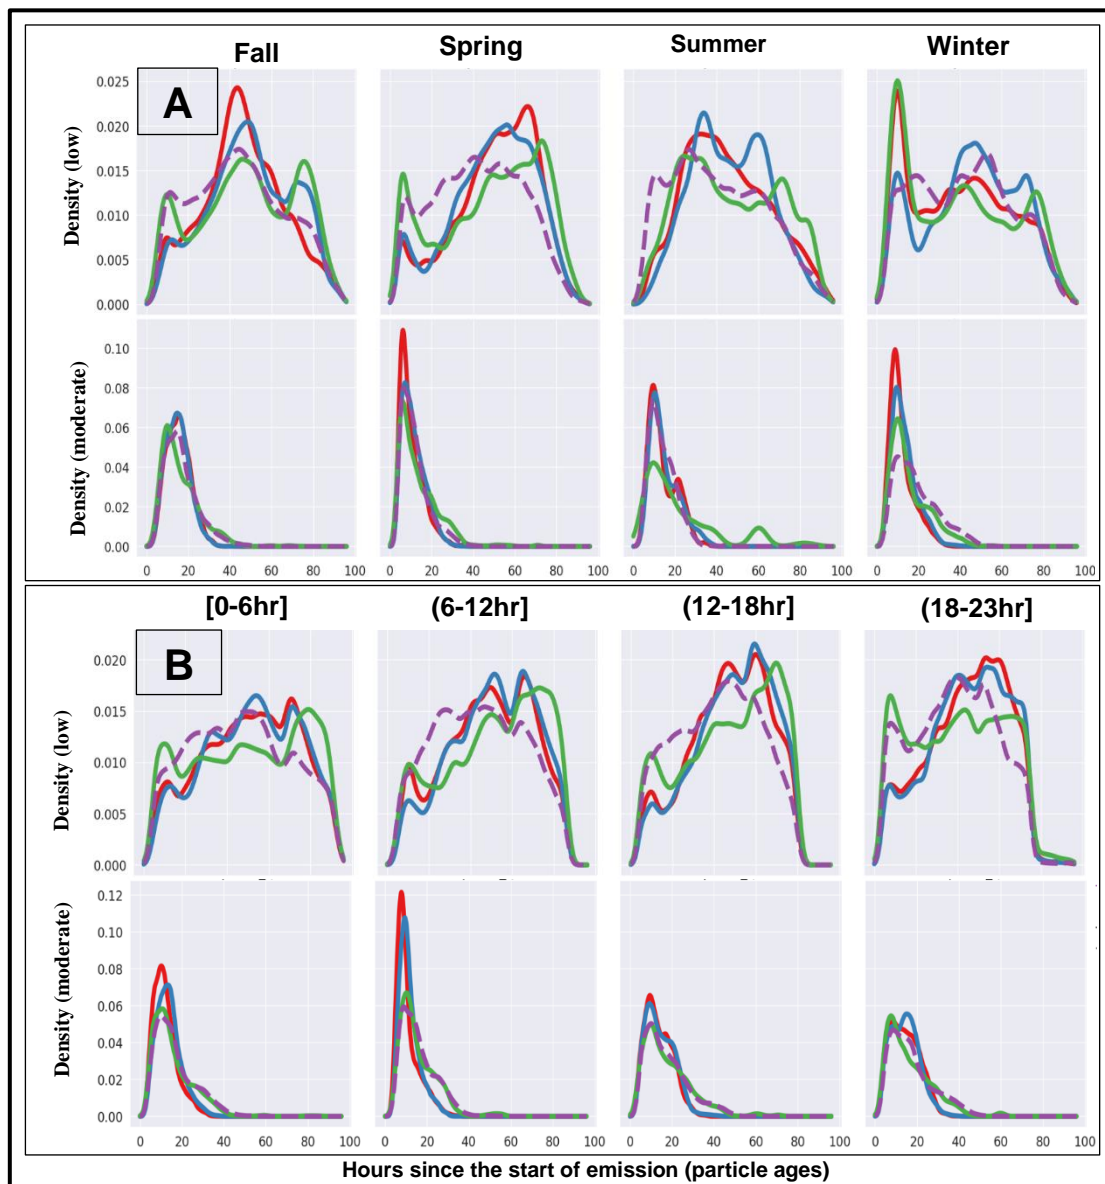

Figure S3 Same as Figure 2 but for the low and moderate concentrations of  $^{131}\text{I}$ .

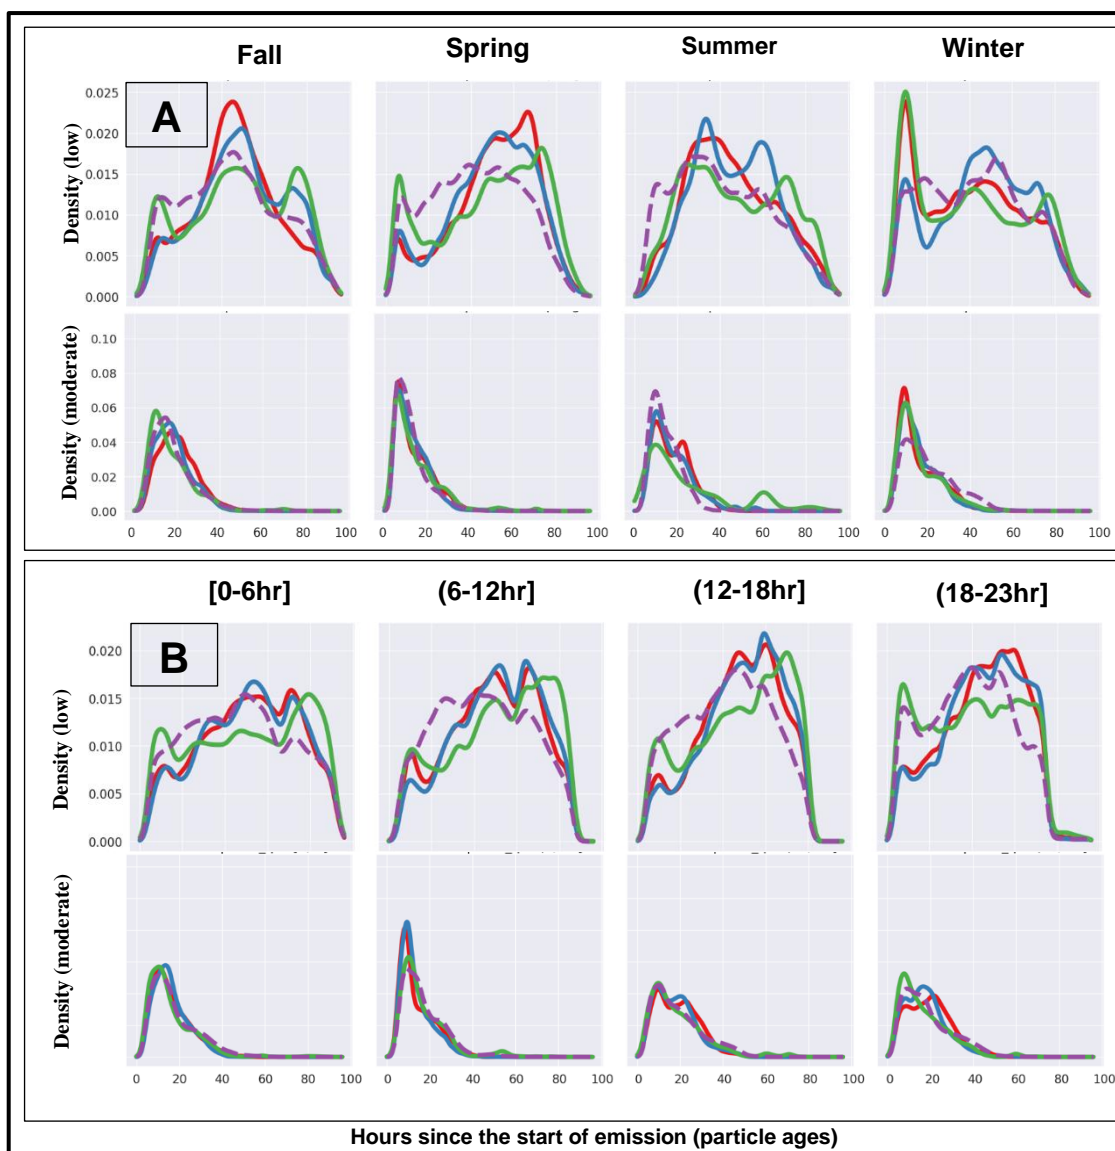

Figure S4 Same as Figure 2 but for the low and moderate concentrations of  $^{137}\text{Cs}$ .

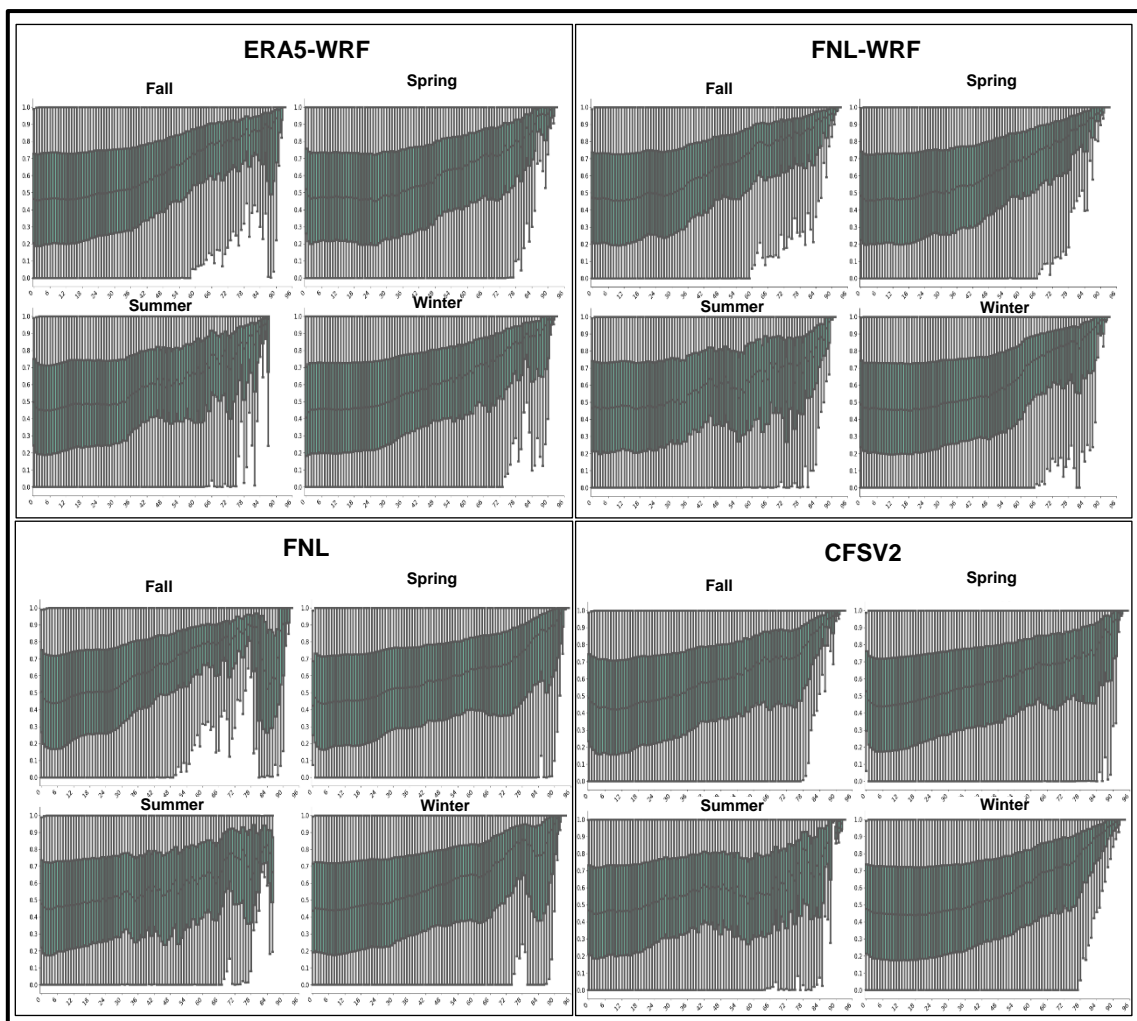

Figure S5 Same as Figure 3 but for all seasons.

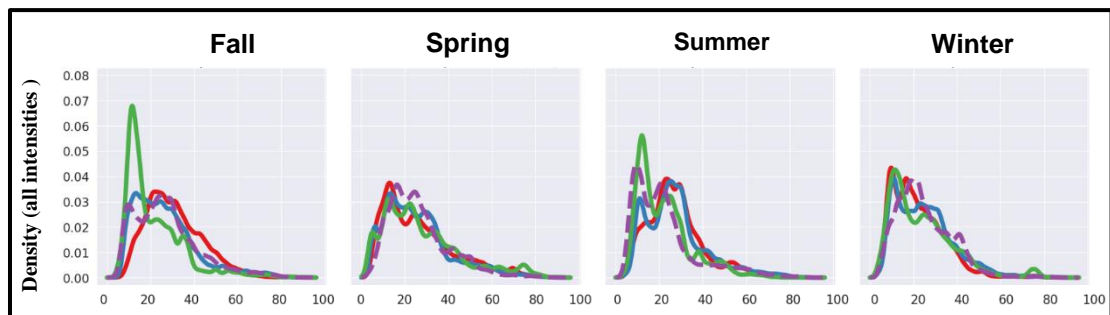

Figure S6 Same as the panel at the top in Figure 2 but for all intensities of  $^{137}\text{Cs}$  depositions.

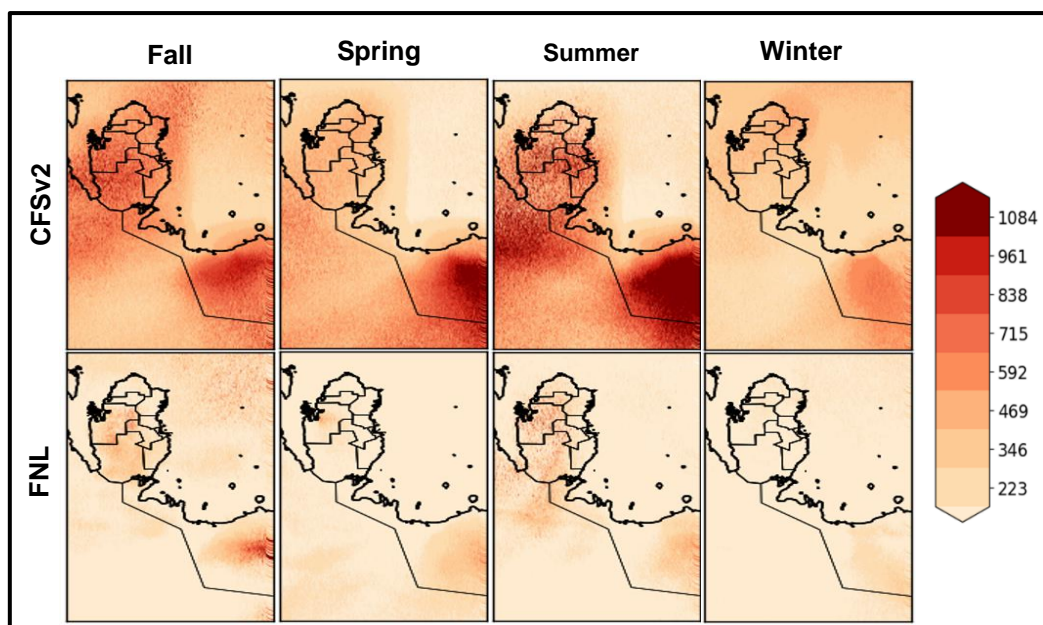

Figure S7 The seasonal median of boundary layer height (m) estimated based on CFSv2 (top row) and FNL (bottom row) inputs.

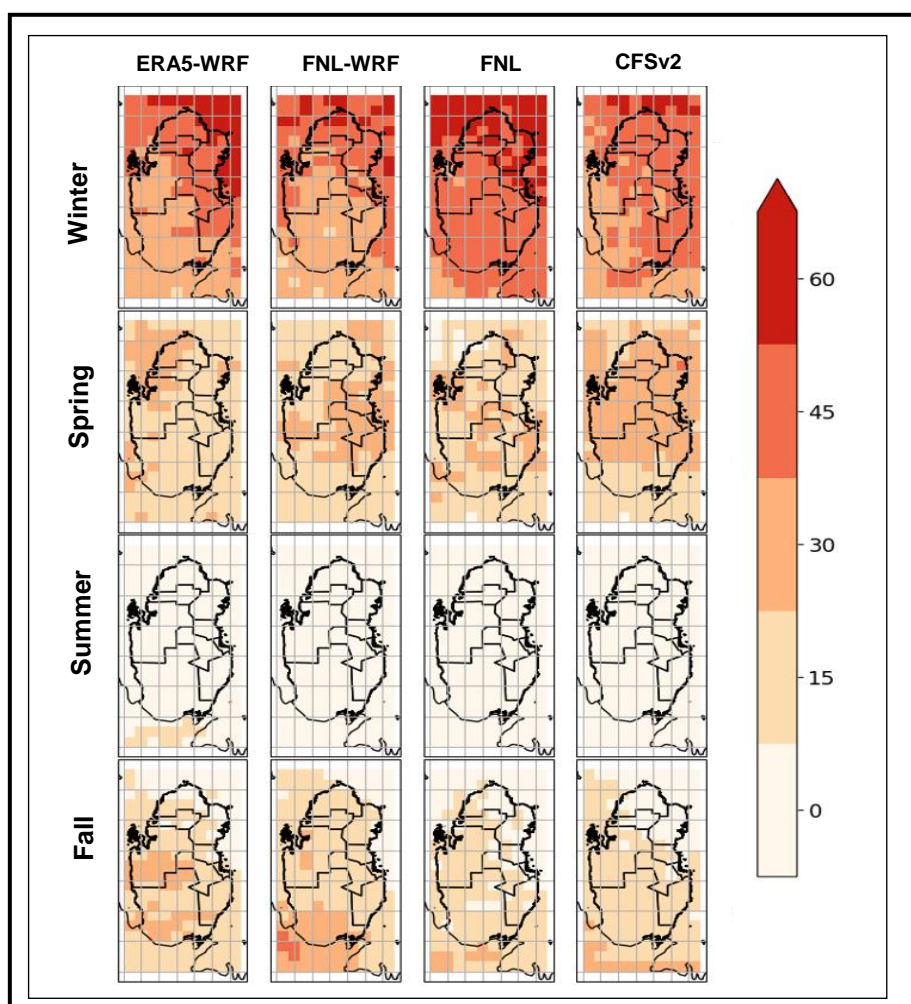

S8 Same as Figure 8-A but for  $^{137}\text{Cs}$  column densities above respective 66<sup>th</sup> percentile.





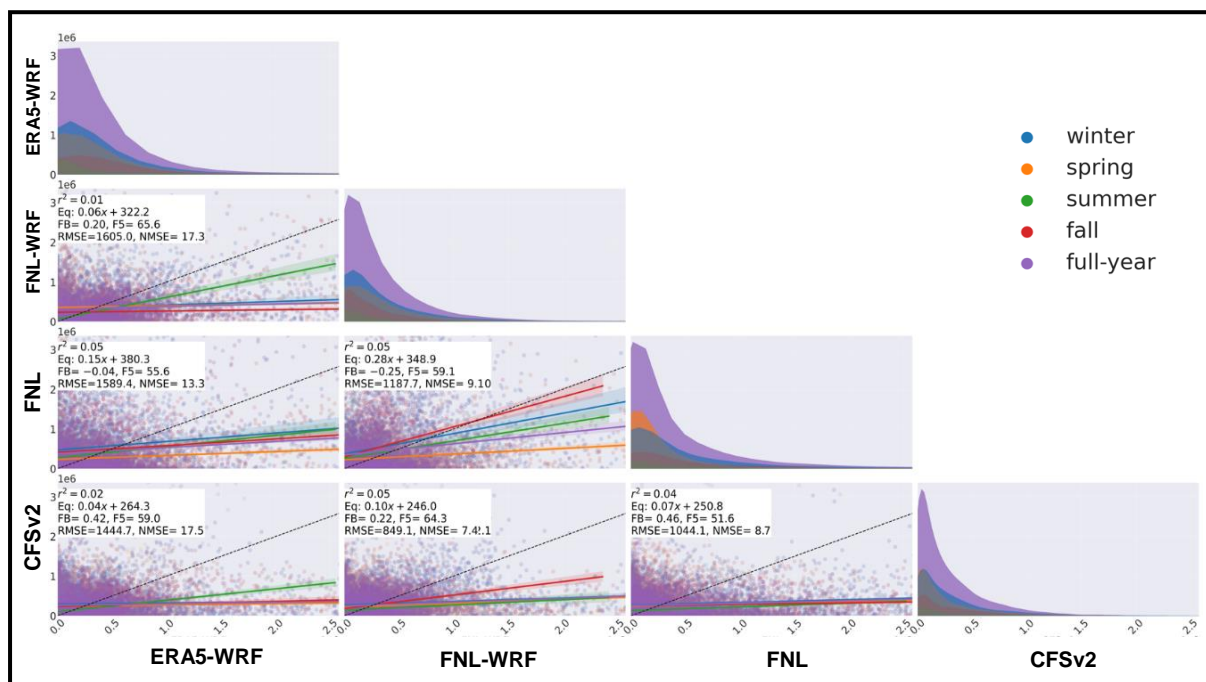

Figure 11 Same as Figure 10 but for  $^{137}\text{Cs}$  deposition

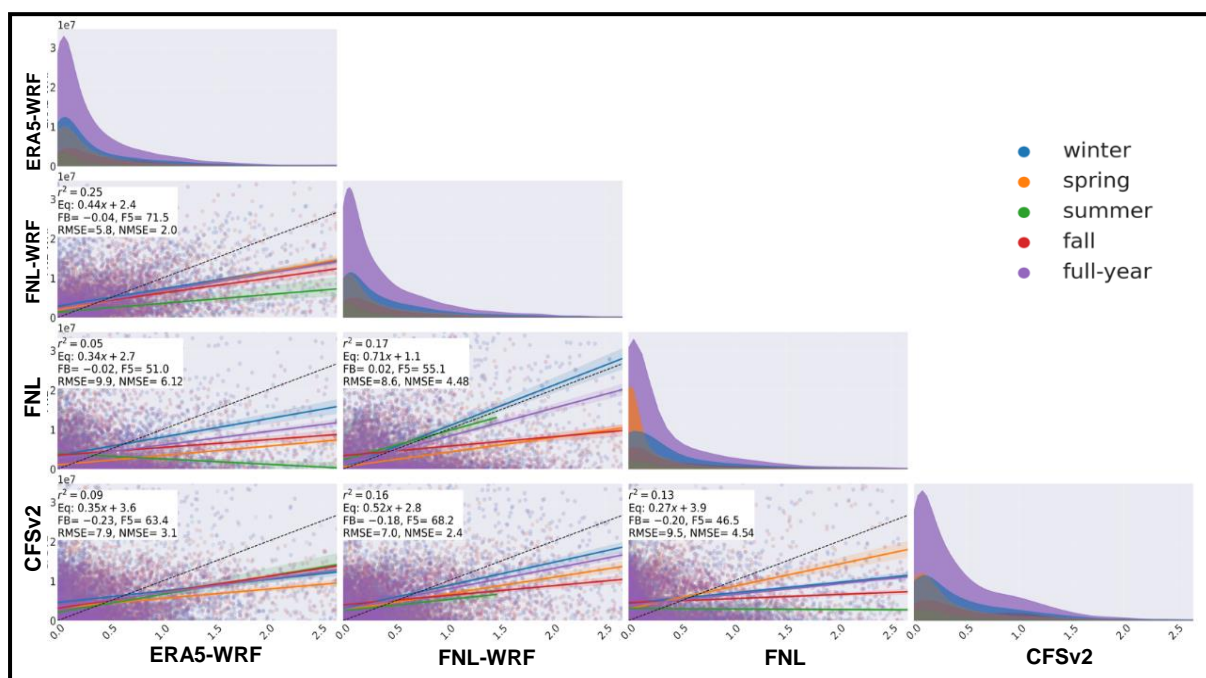

S12 Same as Figure 10 but for  $^{131}\text{I}$  depositions.
